# Supplementary material for: Associations of eHealth Literacy With Health Services Utilization Among College Students: Cross-Sectional Study
Source: PubMed Central journal article supplement (PMC6231732; doi:10.2196/jmir.8897), 2018-10-25
Supplement: jmir_v20i10e283_app1.pdf [file jmir_v20i10e283_app1.pdf]

| aspect        | item                                                                                                              |
|---------------|-------------------------------------------------------------------------------------------------------------------|
| type          | 1. Receiving various forms of medical treatment, such as Chinese medicine, Western medicine, and dental services. |
|               | 2. Receiving medical services at medical institutions such as hospitals, clinics and pharmacies.                  |
|               | 3. Choosing suitable clinic for outpatient care.                                                                  |
| site          | 4. Seeing a doctor at a primary-level clinic near my home.                                                        |
|               | 5. Choosing a suitable site for medical services, such as physician's office, hospital clinic, or emergency room. |
| purpose       | 6. Visiting a physician for preventive care.                                                                      |
|               | 7. Visiting a physician for illness-related care.                                                                 |
|               | 8. Visiting a physician for custodial care.                                                                       |
| time interval | 9. Obtaining a second opinion from another physician.                                                             |
|               | 10. The frequency of outpatient care use.                                                                         |
