# Supplementary material for: Associations of eHealth Literacy With Health Services Utilization Among College Students: Cross-Sectional Study
Source: PubMed Central journal article supplement (PMC6231732; doi:10.2196/jmir.8897), 2018-10-25
Supplement: jmir_v20i10e283_app2.pdf [file jmir_v20i10e283_app2.pdf]

| Variable       | Type   |                            |                  |       | Site |                            |      |       | Purpose |                            |      |       | Time interval |                            |      |       |     |
|----------------|--------|----------------------------|------------------|-------|------|----------------------------|------|-------|---------|----------------------------|------|-------|---------------|----------------------------|------|-------|-----|
|                | B      | Beta                       | T <sub>487</sub> | P     | B    | Beta                       | t    | P     | B       | Beta                       | t    | P     | B             | Beta                       | t    | P     |     |
|                |        |                            |                  | value |      |                            |      | value |         |                            |      | value |               |                            |      | value |     |
| <b>Model 1</b> |        |                            |                  |       |      |                            |      |       |         |                            |      |       |               |                            |      |       |     |
|                | Female | -.04                       | -.03             | -.6   | .55  | -.07                       | -.04 | -.95  | .34     | -.2                        | -.13 | -2.8  | .005          | -.11                       | -.07 | -1.52 | .13 |
|                |        |                            | 0                |       |      |                            |      |       |         | 0                          |      | 5     |               |                            |      |       |     |
|                |        | R=.03, R <sup>2</sup> =.00 |                  |       |      | R=.04, R <sup>2</sup> =.00 |      |       |         | R=.13, R <sup>2</sup> =.02 |      |       |               | R=.07, R <sup>2</sup> =.01 |      |       |     |
|                |        | F <sub>1,487</sub> =.36    |                  |       |      | F <sub>1,487</sub> =.91    |      |       |         | F <sub>1,487</sub> =8.11   |      |       |               | F <sub>1,487</sub> =2.30   |      |       |     |

<sup>a</sup> $\Delta R^2$ : R-squared change.
