# Supplementary material for: Associations of eHealth Literacy With Health Services Utilization Among College Students: Cross-Sectional Study
Source: PubMed Central journal article supplement (PMC6231732; doi:10.2196/jmir.8897), 2018-10-25
Supplement: jmir_v20i10e283_app3.pdf [file jmir_v20i10e283_app3.pdf]

| Variable                | Type        |                                                                 |                  |         | Site |                                                    |      |         | Purpose |                                                    |      |         | Time interval |                                                    |      |         |       |
|-------------------------|-------------|-----------------------------------------------------------------|------------------|---------|------|----------------------------------------------------|------|---------|---------|----------------------------------------------------|------|---------|---------------|----------------------------------------------------|------|---------|-------|
|                         | B           | Beta                                                            | T <sub>484</sub> | P value | B    | Beta                                               | t    | P value | B       | Beta                                               | t    | P value | B             | Beta                                               | t    | P value |       |
| <b>Model 2</b>          |             |                                                                 |                  |         |      |                                                    |      |         |         |                                                    |      |         |               |                                                    |      |         |       |
|                         | Female      | -.02                                                            | -.01             | -.26    | .79  | -.03                                               | -.02 | -.48    | .63     | -.18                                               | -.11 | -2.63   | .009          | -.14                                               | -.09 | -1.94   | .13   |
| <b>eHealth literacy</b> |             |                                                                 |                  |         |      |                                                    |      |         |         |                                                    |      |         |               |                                                    |      |         |       |
|                         | Functional  | -.01                                                            | -.01             | -.28    | .78  | .01                                                | .01  | .26     | .79     | -.01                                               | -.01 | -.28    | .78           | -.26                                               | -.23 | -4.99   | <.001 |
|                         | Interactive | .17                                                             | .15              | 2.43    | .016 | .21                                                | .17  | 2.89    | .004    | .06                                                | .06  | .88     | .38           | .21                                                | .18  | 2.84    | .005  |
|                         | Critical    | .20                                                             | .19              | 2.98    | .003 | .30                                                | .25  | 4.23    | <.001   | .29                                                | .26  | 4.21    | <.001         | .00                                                | .00  | .04     | .97   |
|                         |             | R=.31, R <sup>2</sup> =.10<br><sup>a</sup> ΔR <sup>2</sup> =.10 |                  |         |      | R=.40, R <sup>2</sup> =.16<br>ΔR <sup>2</sup> =.16 |      |         |         | R=.33, R <sup>2</sup> =.11<br>ΔR <sup>2</sup> =.09 |      |         |               | R=.26, R <sup>2</sup> =.07<br>ΔR <sup>2</sup> =.06 |      |         |       |
|                         |             | F <sub>4,484</sub> =17.02                                       |                  |         |      | F <sub>4,484</sub> =30.86                          |      |         |         | F <sub>4,484</sub> =16.14                          |      |         |               | F <sub>4,484</sub> =10.83                          |      |         |       |

<sup>a</sup>ΔR<sup>2</sup>: R-squared change.
